# Supplementary material
Source: publisher figshare collection journal article supplement (https://sage.figshare.com/ndownloader/files/13585901)
Supplement: Supplementary file 1 [file 13585901]

(a)Pfizer

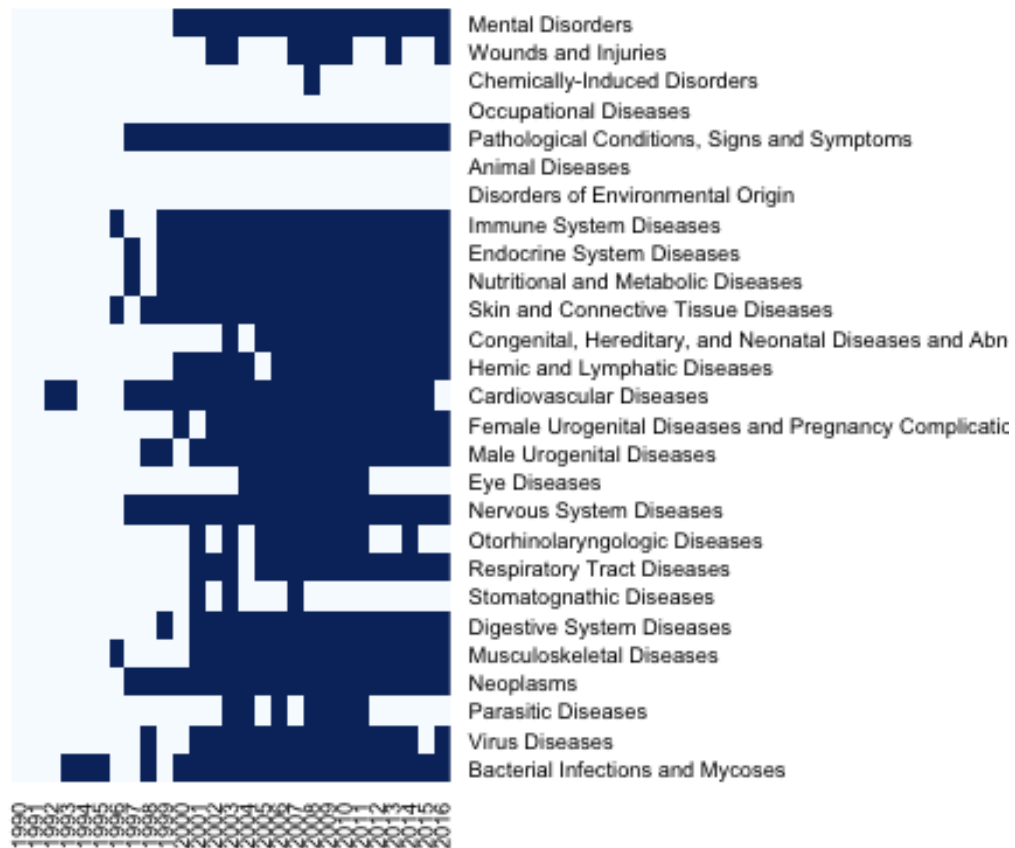

(b)GlaxoSmithKline

|  |                                                       |
|--|-------------------------------------------------------|
|  | Mental Disorders                                      |
|  | Wounds and Injuries                                   |
|  | Chemically-Induced Disorders                          |
|  | Occupational Diseases                                 |
|  | Pathological Conditions, Signs and Symptoms           |
|  | Animal Diseases                                       |
|  | Disorders of Environmental Origin                     |
|  | Immune System Diseases                                |
|  | Endocrine System Diseases                             |
|  | Nutritional and Metabolic Diseases                    |
|  | Skin and Connective Tissue Diseases                   |
|  | Congenital, Hereditary, and Neonatal Diseases and Abn |
|  | Hemic and Lymphatic Diseases                          |
|  | Cardiovascular Diseases                               |
|  | Female Urogenital Diseases and Pregnancy Complicatic  |
|  | Male Urogenital Diseases                              |
|  | Eye Diseases                                          |
|  | Nervous System Diseases                               |
|  | Otorhinolaryngologic Diseases                         |
|  | Respiratory Tract Diseases                            |
|  | Stomatognathic Diseases                               |
|  | Digestive System Diseases                             |
|  | Musculoskeletal Diseases                              |
|  | Neoplasms                                             |
|  | Parasitic Diseases                                    |
|  | Virus Diseases                                        |
|  | Bacterial Infections and Mycoses                      |

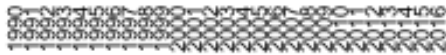

(c)Merck Sharp & Dohme Corp.

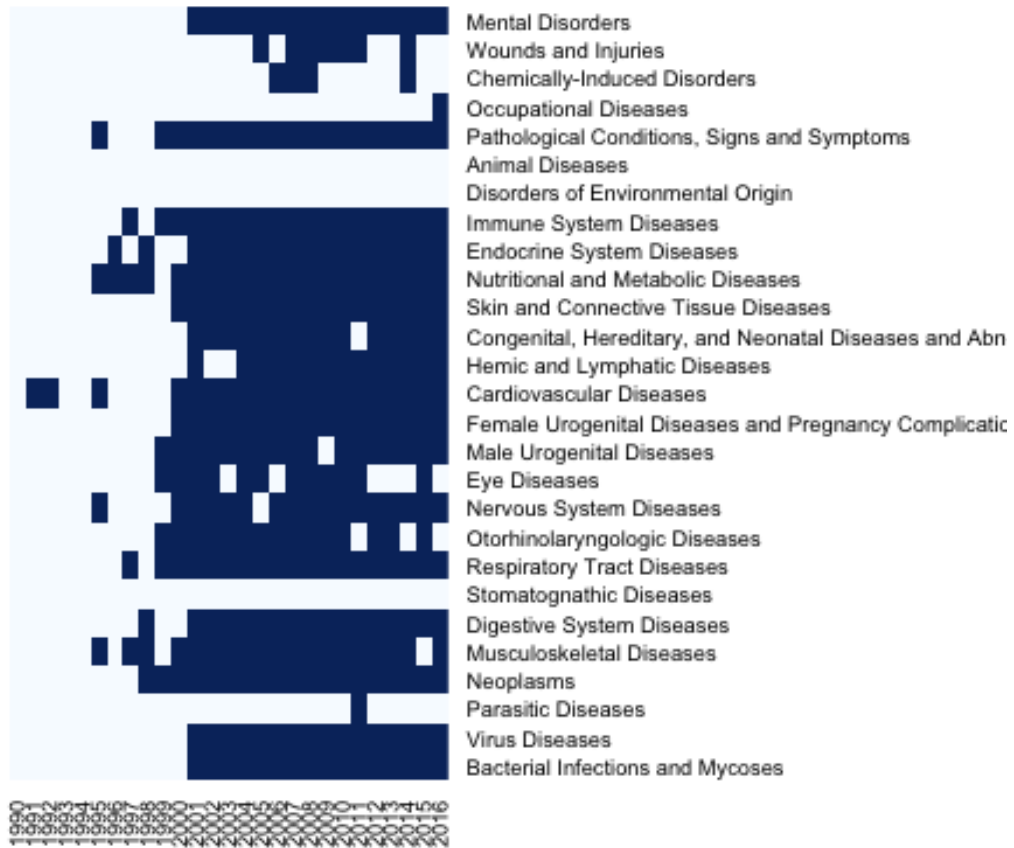

(d)AstraZeneca

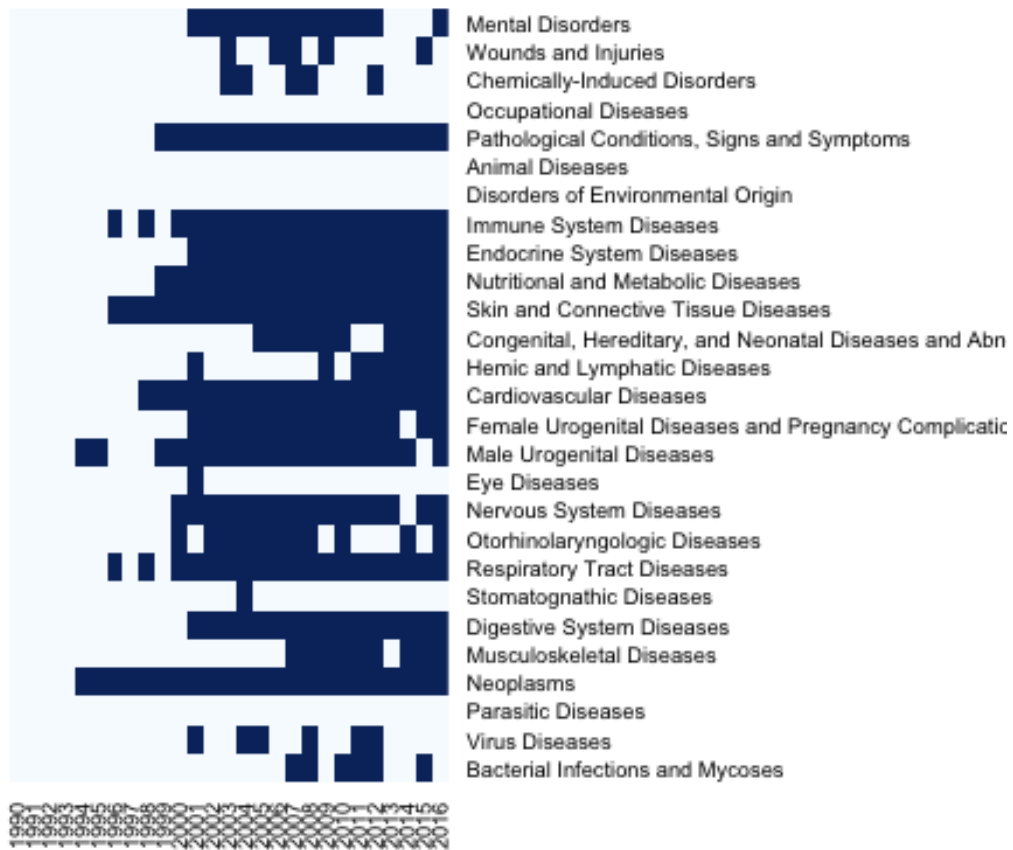

(e)Novartis Pharmaceuticals

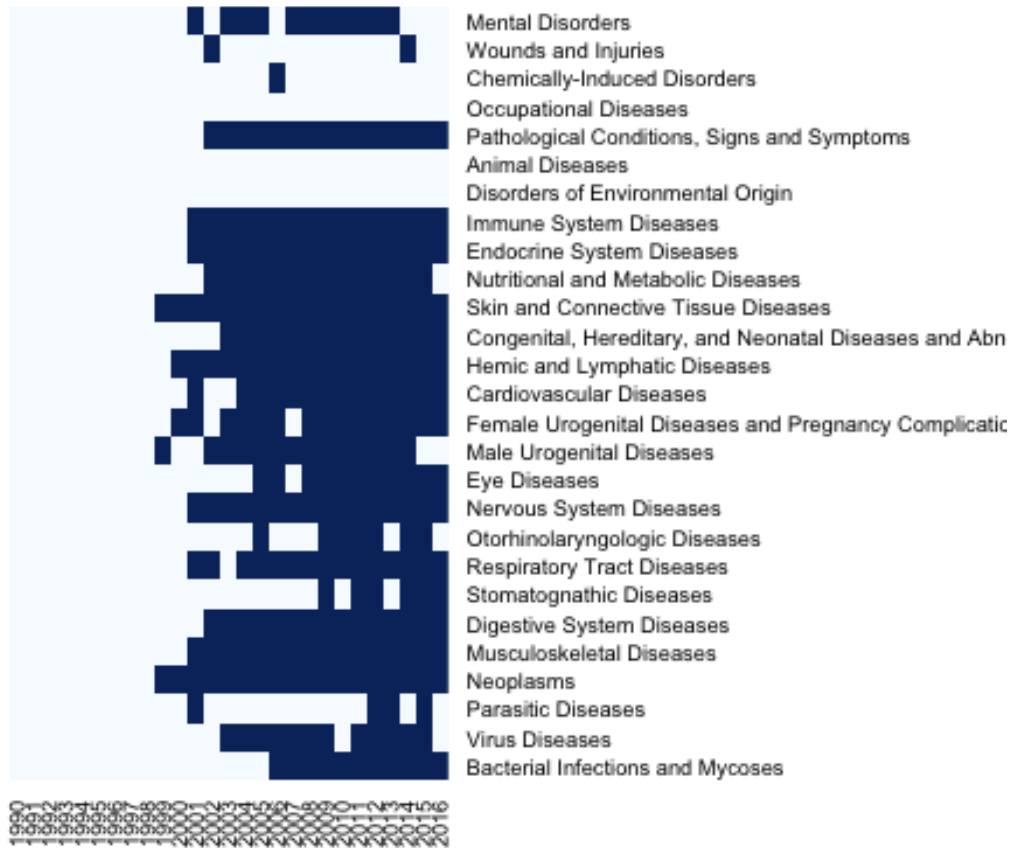

(f)Eli Lilly and Company

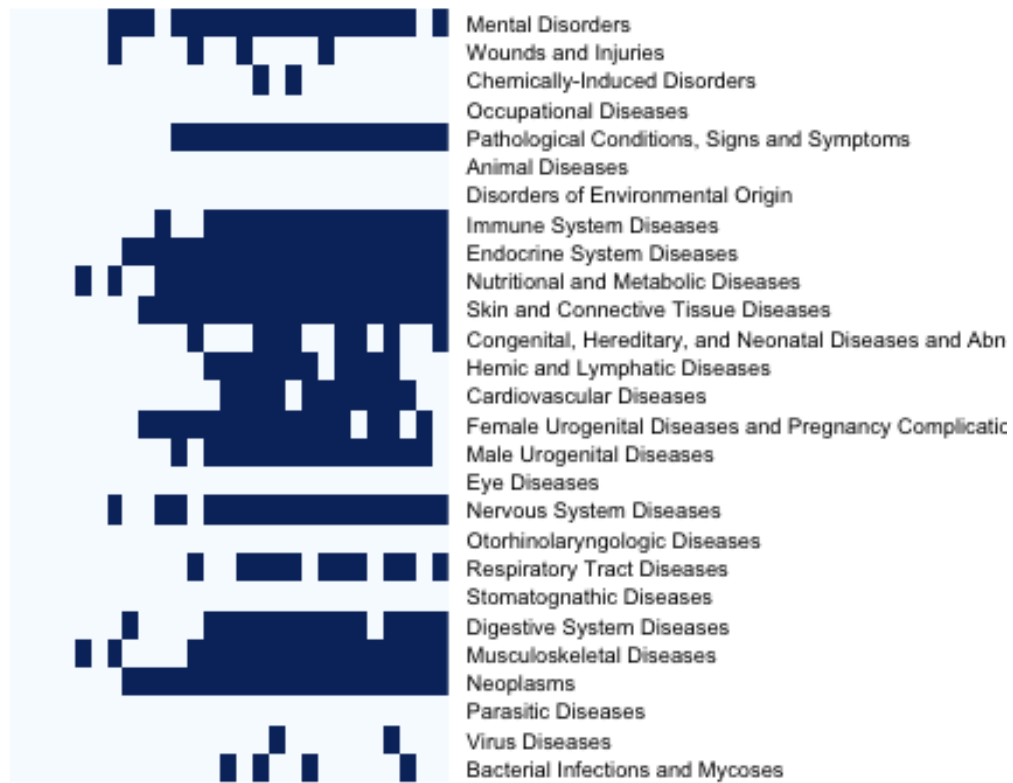

0 10 20 30 40 50 60 70 80 90 100

(g)Boehringer Ingelheim

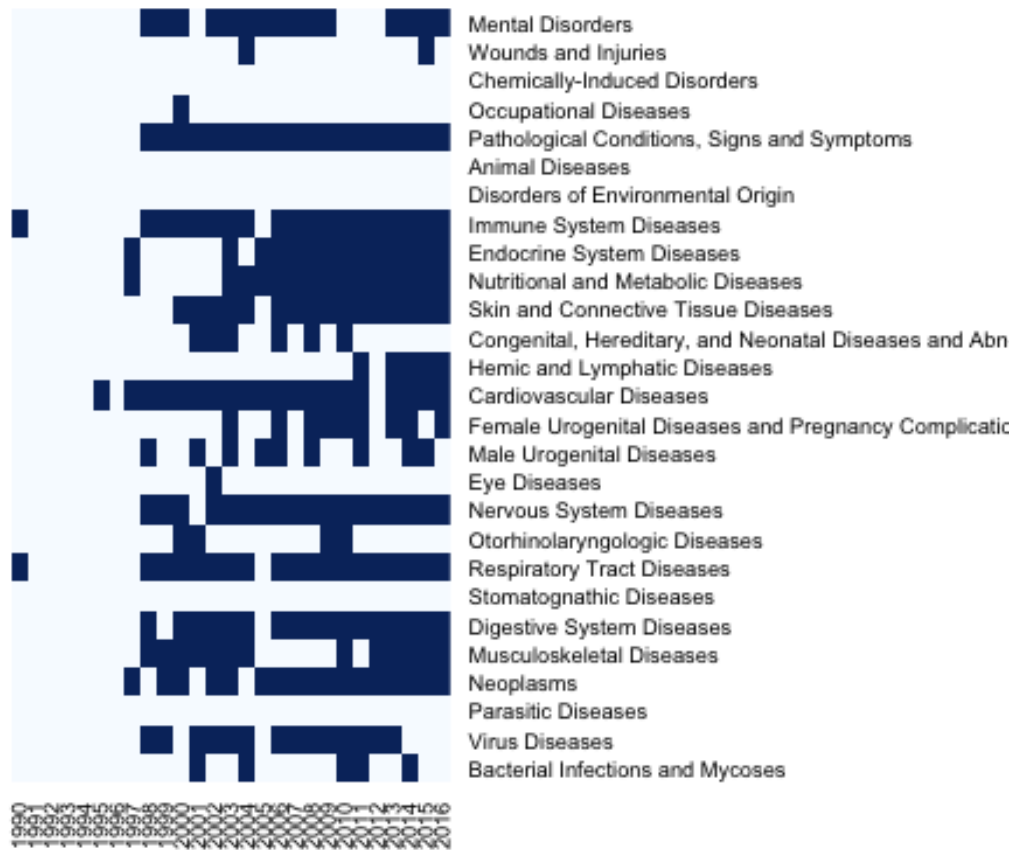

### (h) Hoffmann-La Roche

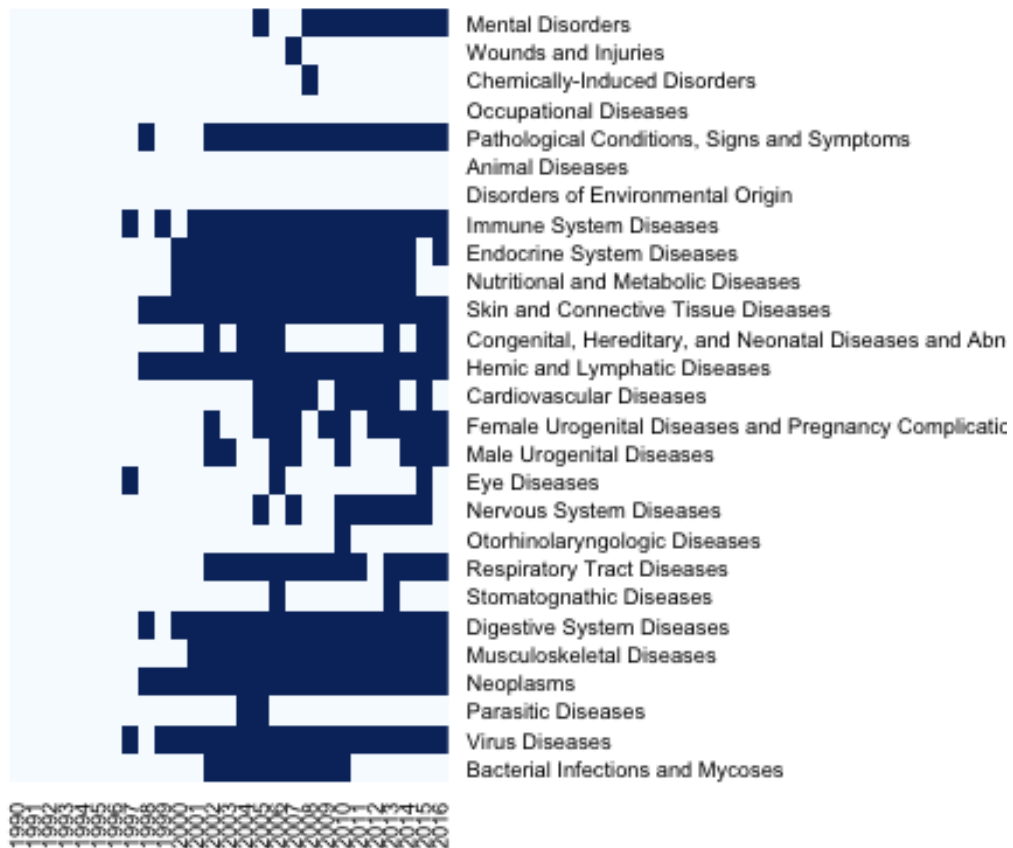



(i) Sanofi

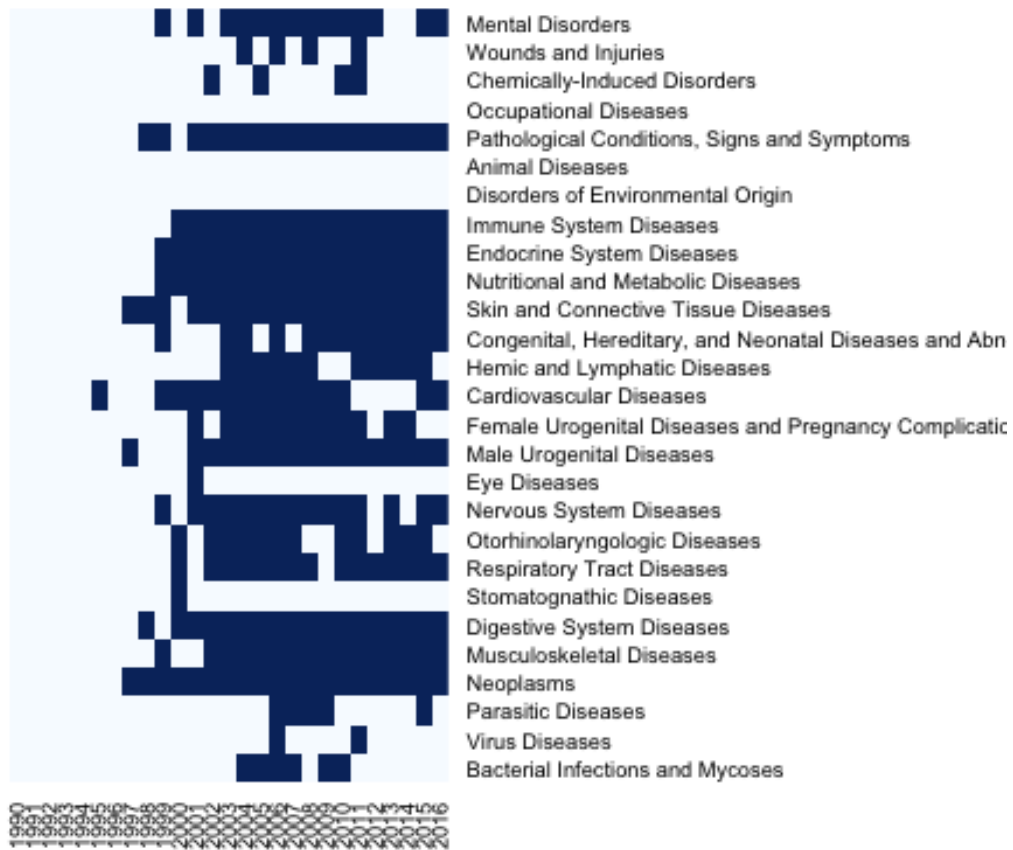

(j)Bristol-Myers Squibb

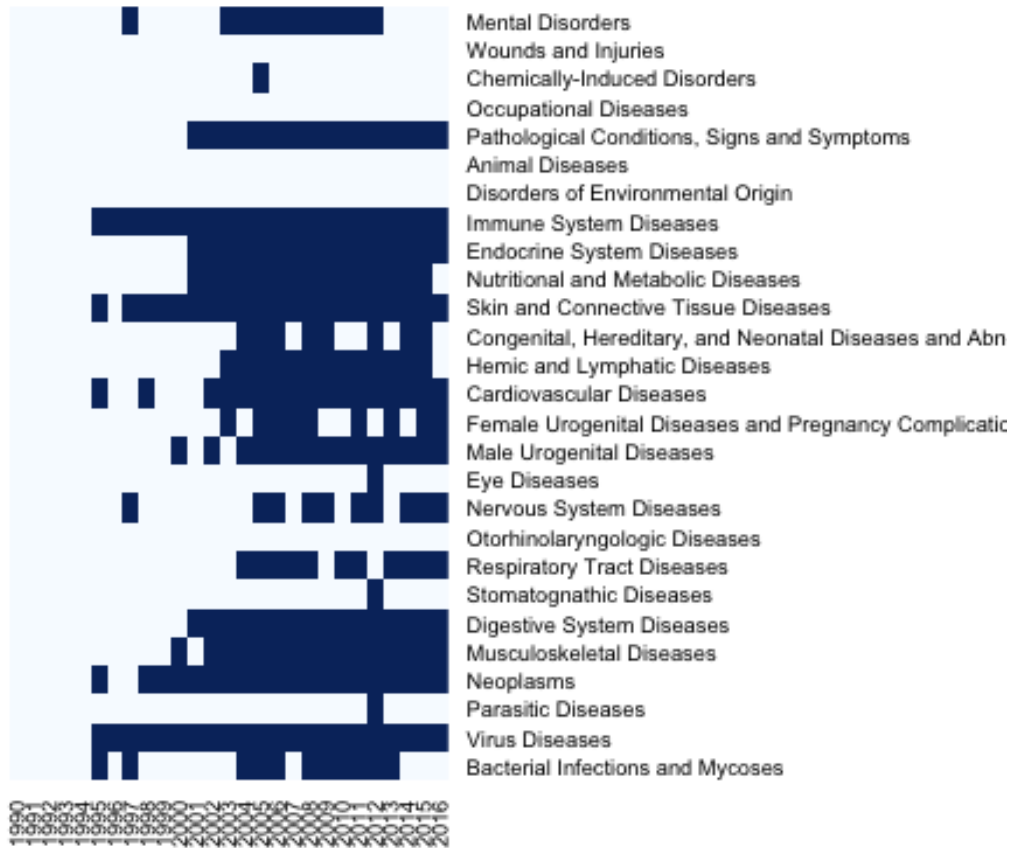

(k)Novartis

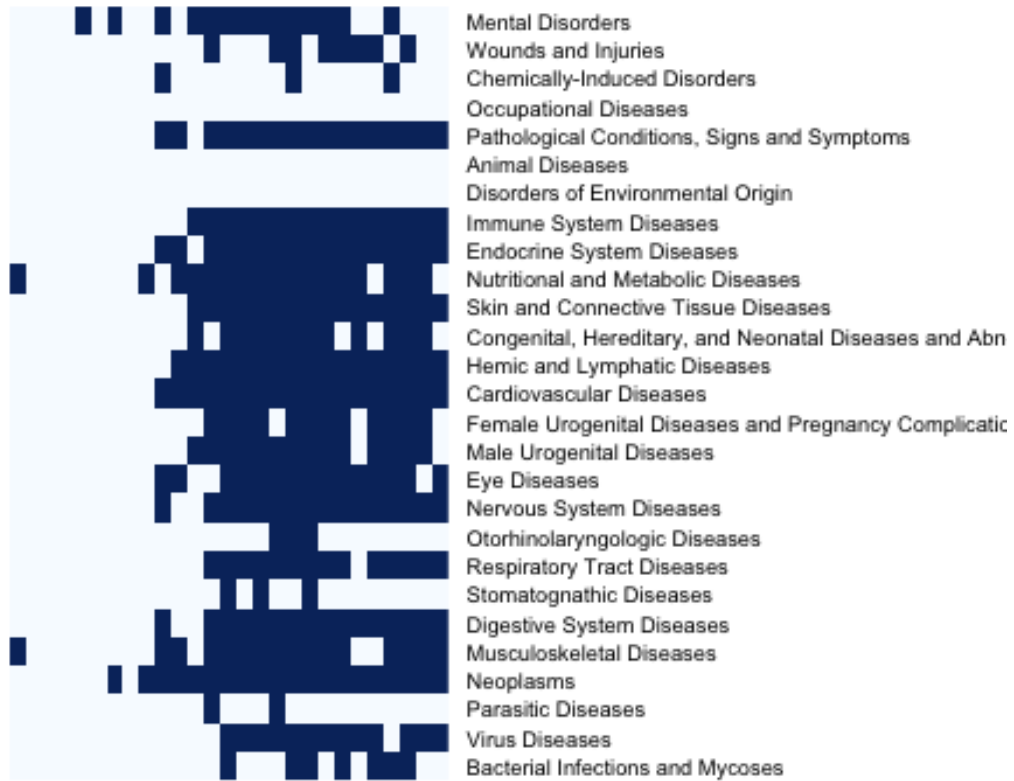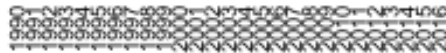

(I)Bayer

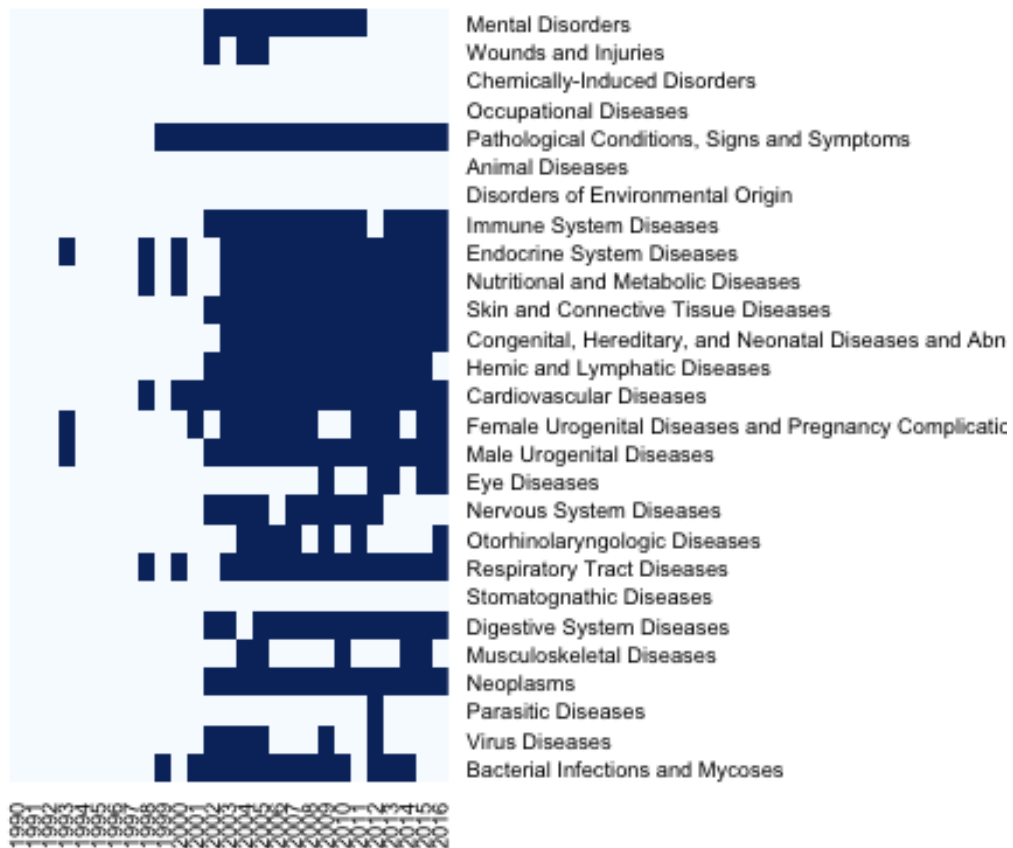

(m)Genentech, Inc.

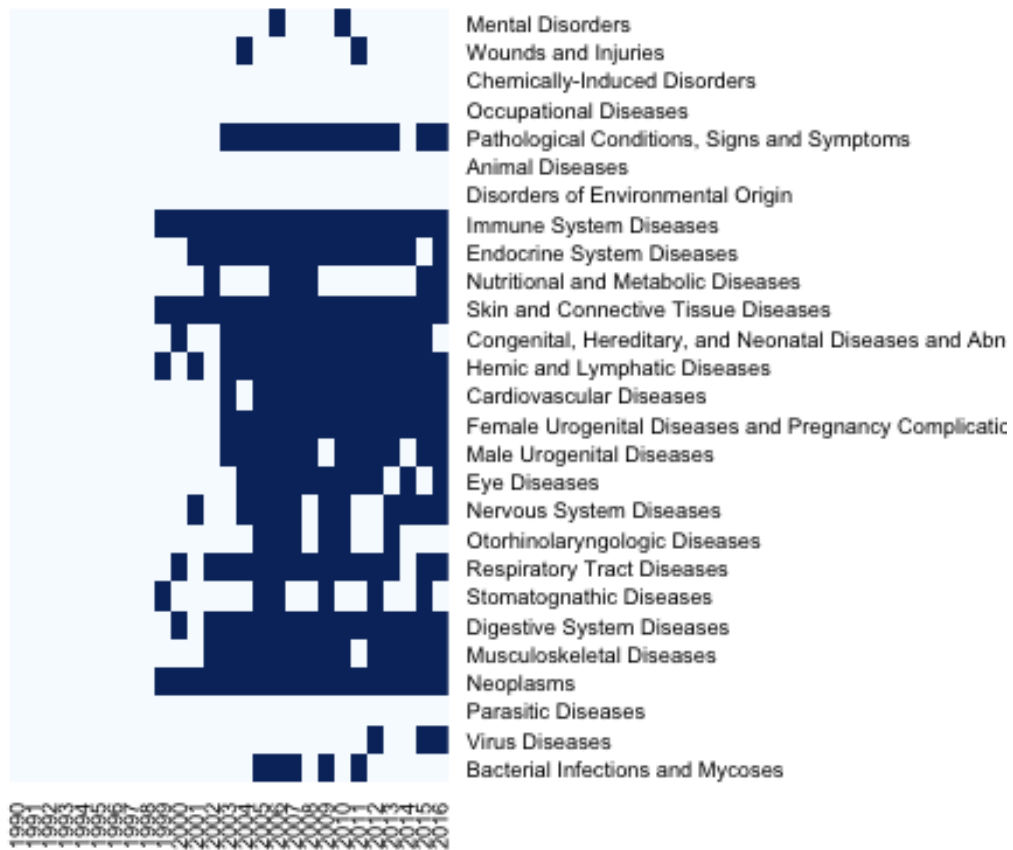

(n)Amgen

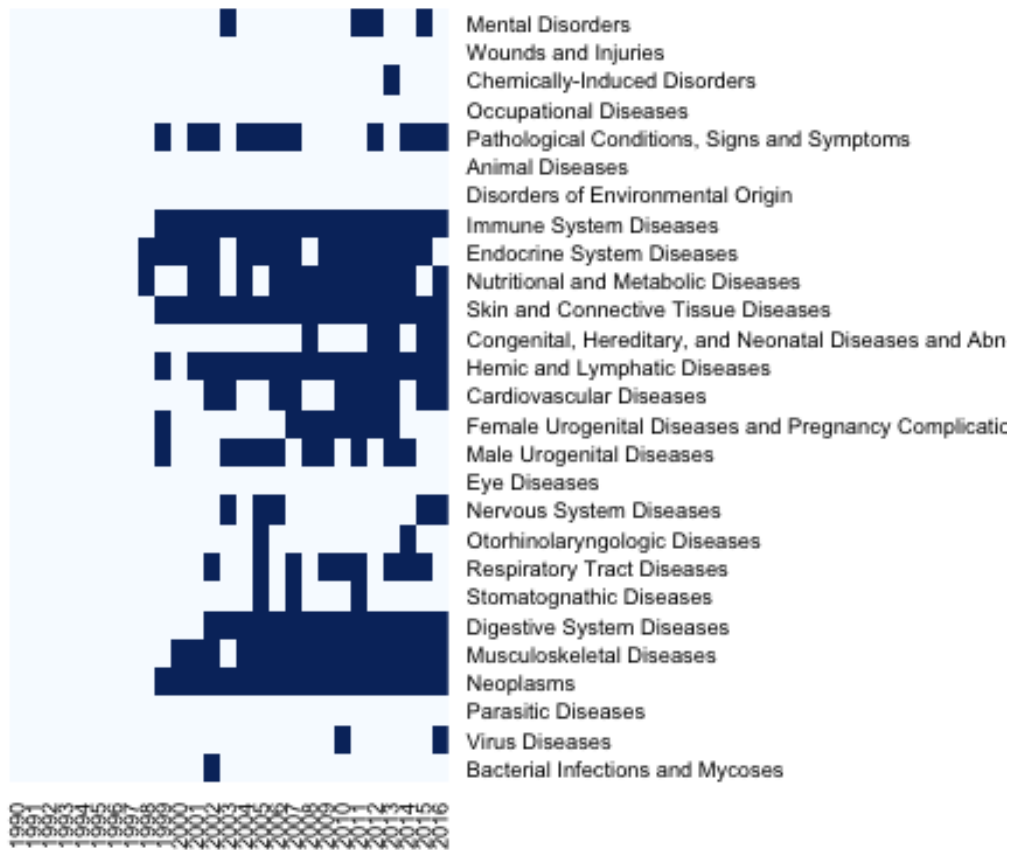

(o)Novo Nordisk A/S

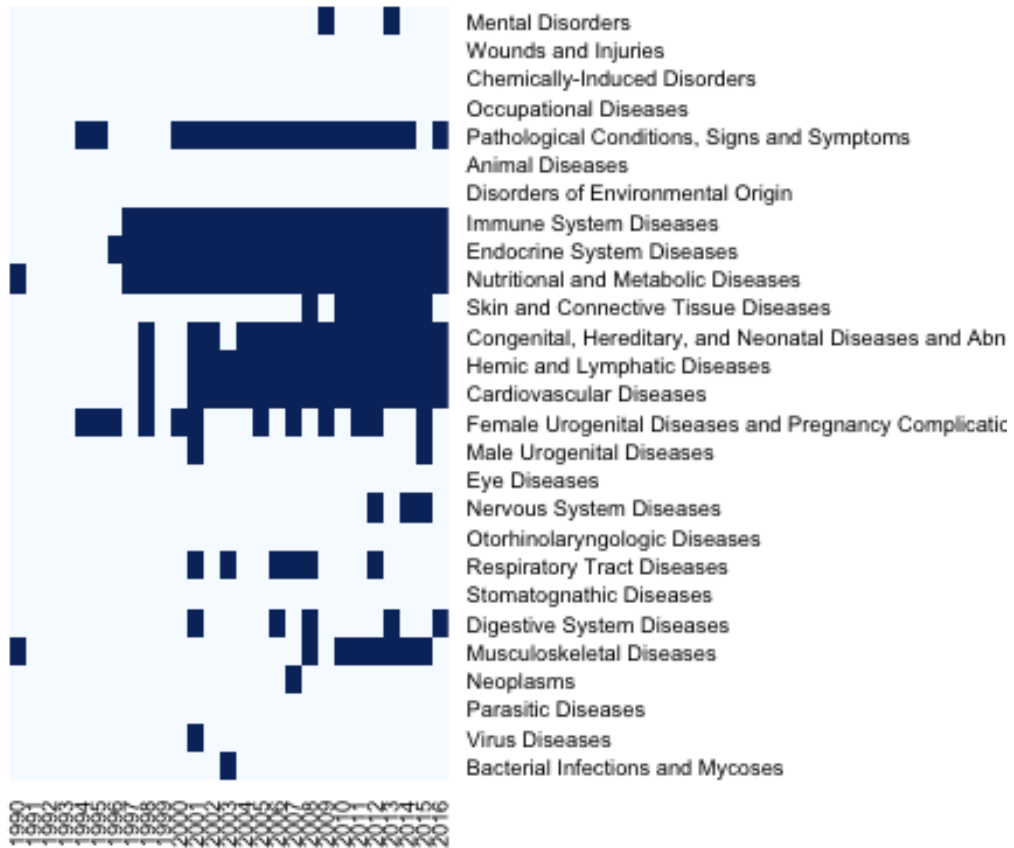

(p)Gilead Sciences

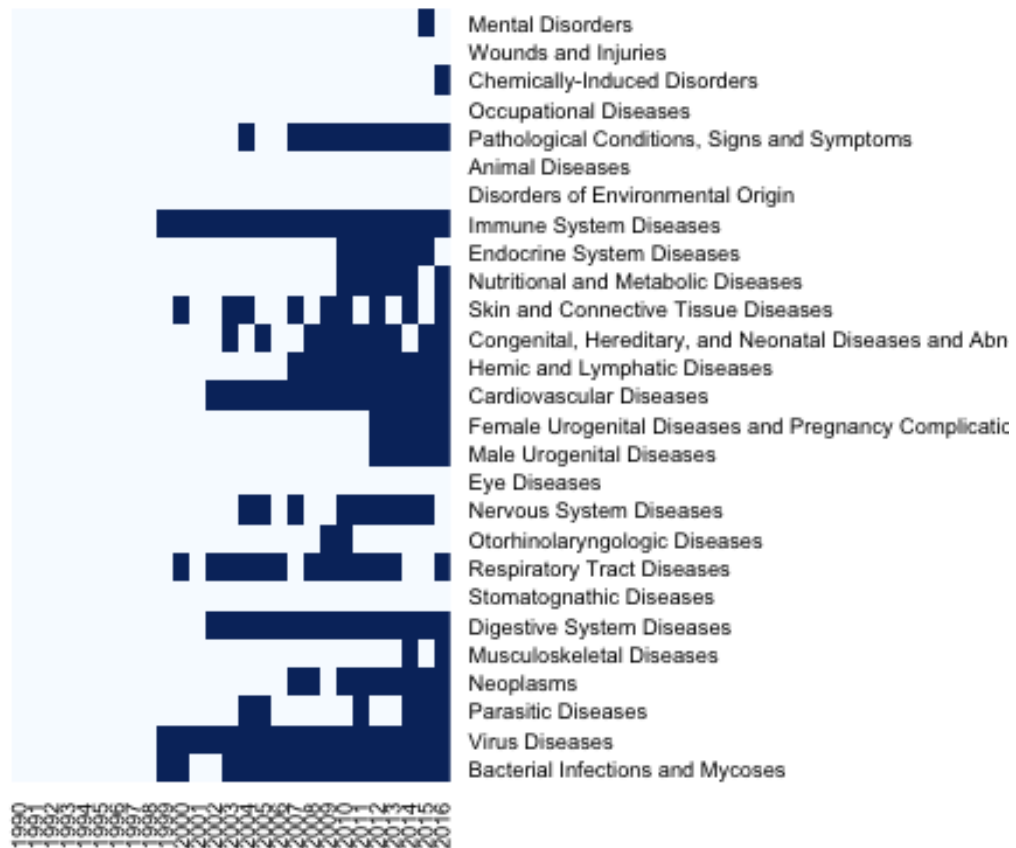



(q)Takeda

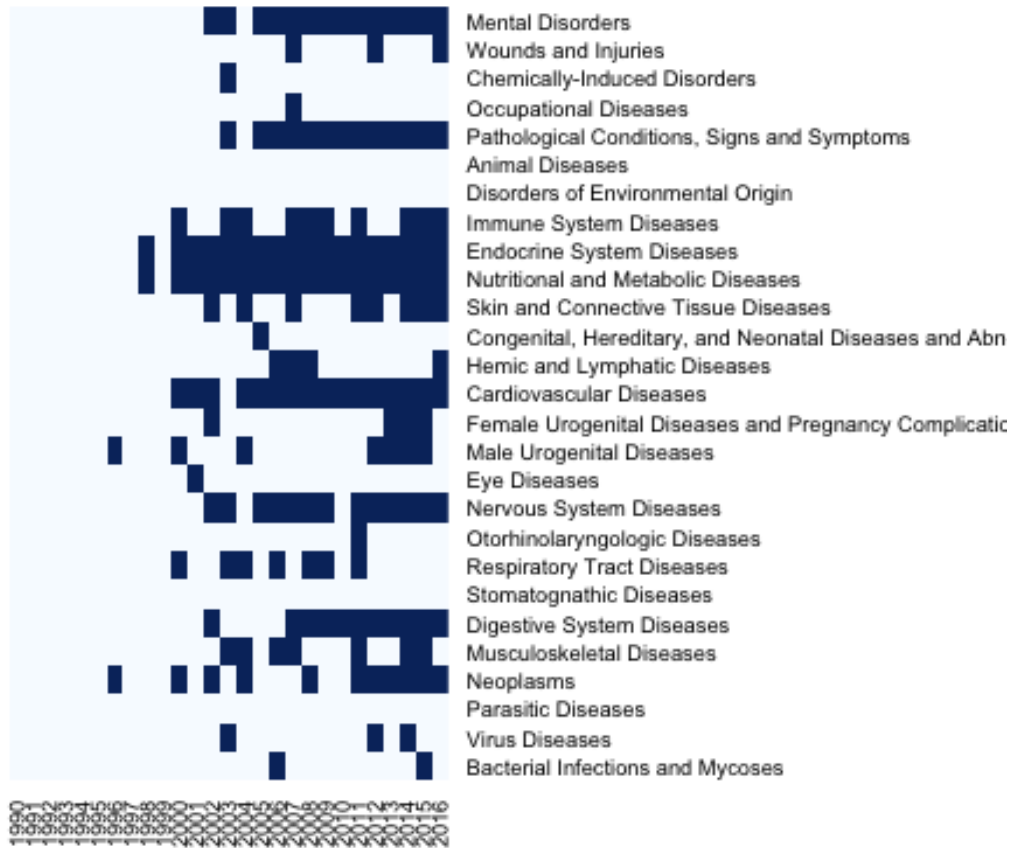

(r)Astellas Pharma Inc

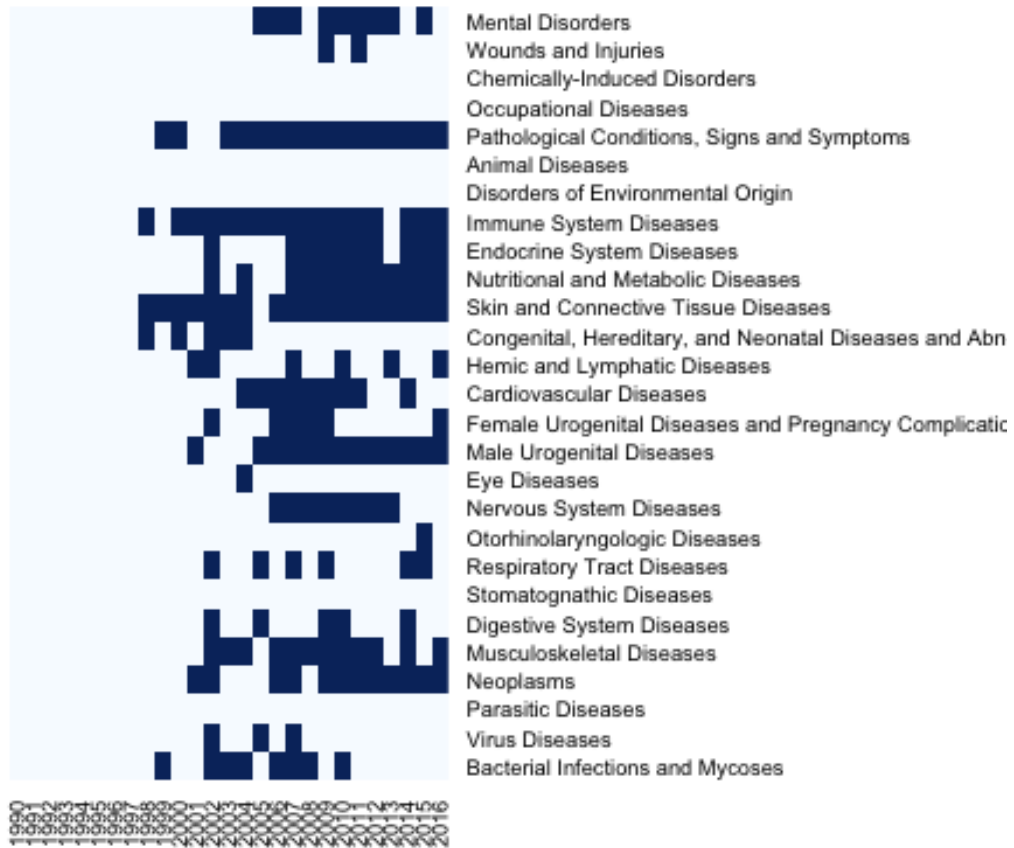

(s)Celgene Corporation

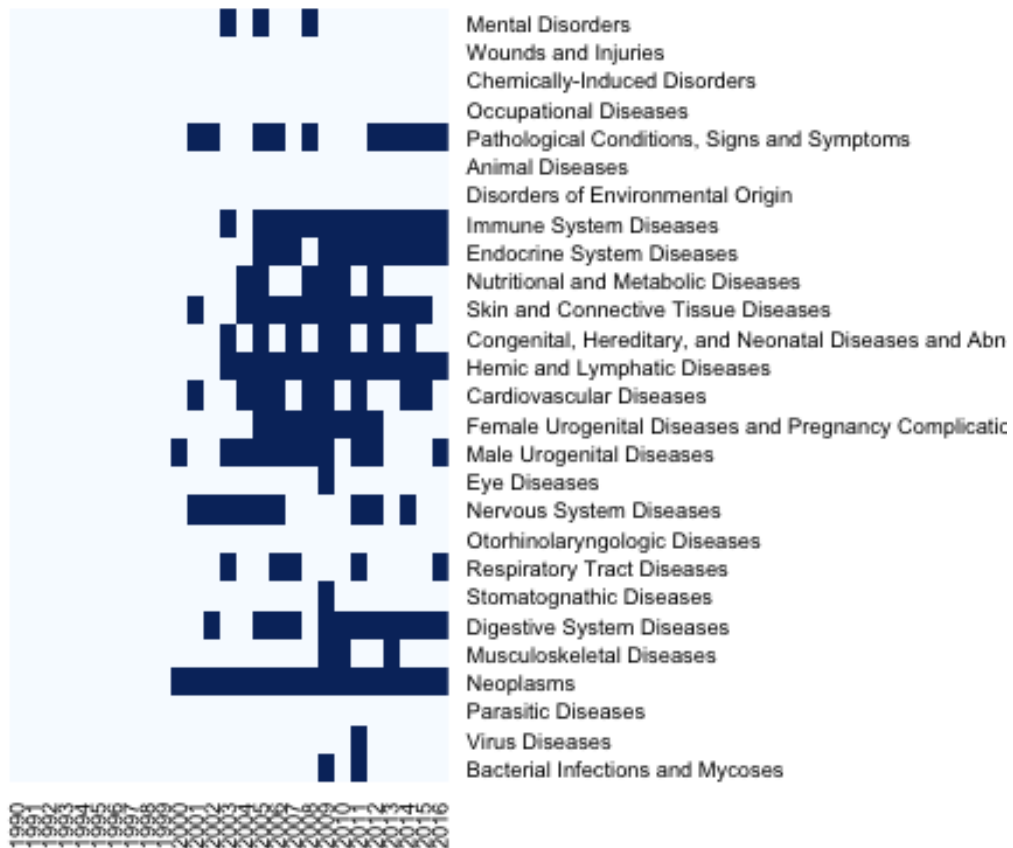

(t)Johnson & Johnson Pharmaceutical Research & Development, L.L.C.

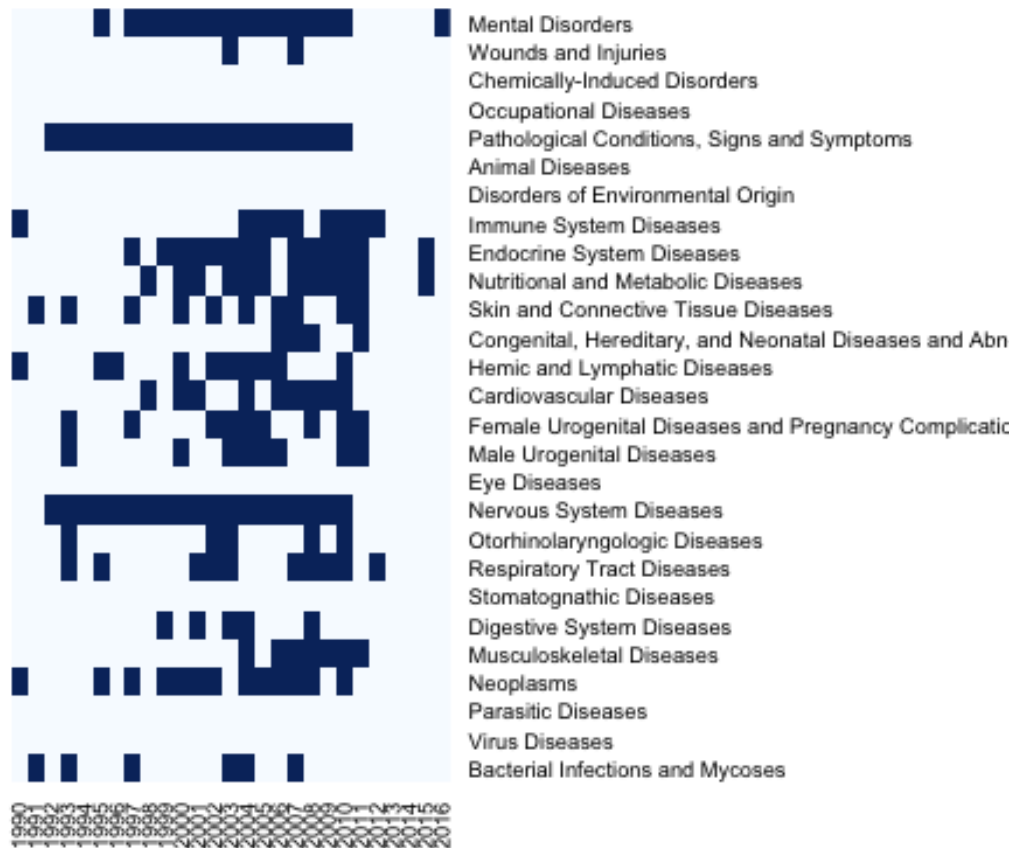

**Figure S2. Therapeutic area maps for the top 20 pharmaceutical firms.** The horizontal and vertical axes indicate year and 27 therapeutic areas, respectively. A filled cell indicates at least one clinical trial in the therapeutic area in the vertical axis started in the year in the horizontal axis.
